# Supplementary material for: Analysis of synonymous codon usage patterns in sixty-four different bivalve species
Source: PeerJ. 2015 Dec 14;3:e1520. doi: 10.7717/peerj.1520 (PMC4690358; doi:10.7717/peerj.1520)
Supplement: Table S1 — The RNA-seq studies used are listed, together with SRA accession IDs and assembly statistics. [file peerj-03-1520-s001.xlsx]

## Sheet: Sheet1
Species	Sequence source	SRA datasets	Assembled contigs	Total number of TransDecoder predictions	Orthologs identified	Mean CDS length
Anadara trapezia	Illumina RNA-seq	SRX323049	42924	25528	2423	903
Arctica islandica	Illumina RNA-seq	SRX687761	50231	17587	1820	803
Argopecten irradians	Illumina RNA-seq	SRX470082	33994	20556	2185	1035
Astarte sulcata	Illumina RNA-seq	SRX644667	22817	8663	845	657
Atrina rigida	Illumina RNA-seq	SRX687763	36827	12805	1877	926
Azumapecten farreri	Illumina RNA-seq	SRX404364; SRX218546	27894	14412	1690	763
Bathymodiolus azoricus	454 Life Sciences RNA-seq	SRX027580	22914	5780	812	602
Bathymodiolus platifrons	Illumina RNA-seq	SRX610901-2; SRX436365	78556	28925	2601	1385
Cardites antiquata	Illumina RNA-seq	SRX687773	43696	14069	1475	690
Cerastoderma edule	Illumina RNA-seq	SRX687776	19488	4995	716	634
Corbicula fluminea	Illumina RNA-seq	SRX209446	27804	14501	1592	905
Crassostrea angulata	Illumina RNA-seq	SRX481252-4	41686	25508	2697	1311
Crassostrea corteziensis	Illumina RNA-seq	SRX641340; SRX471689	64284	28853	2655	1366
Crassostrea gigas	Genome sequencing	/	/	/	2846	1787
Crassostrea hongkongensis	Illumina RNA-seq	SRX365659-60	47357	27424	2686	1320
Crassostrea virginica	Illumina RNA-seq	SRX551498-516; SRX118365	50802	29664	2721	1329
Cycladicama cumingii	Illumina RNA-seq	SRX687783	25251	8146	1314	729
Cyrenoida floridana	Illumina RNA-seq	SRX687777	27907	7634	862	537
Diplodonta sp. VG-2014	Illumina RNA-seq	SRX701840	30290	11076	1422	678
Donacilla cornea	Illumina RNA-seq	SRX687785	22817	7558	950	610
Elliptio complanata	Illumina RNA-seq	TSA: GAHW00000000.1	138264	24534	2489	1379
Ennucula tenuis	Illumina RNA-seq	SRX091980	68090	28466	2352	1138
Eucrassatrella cumingii	Illumina RNA-seq	SRX687772	30931	7920	926	581
Galeomma turtoni	Illumina RNA-seq	SRX687768	36337	20577	1630	810
Geukensia demissa	454 Life Sciences RNA-seq	courtesy of prof. PA Fields	58837	23846	1696	733
Glossus humanus	Illumina RNA-seq	SRX687780	22543	8700	1108	615
Hiatella arctica	Illumina RNA-seq	SRX687781	25329	11389	1426	670
Lampsilis cardium	Illumina RNA-seq	SRX687767	41435	10531	1384	716
Lamychaena hians	Illumina RNA-seq	SRX687779	19585	5900	850	580
Laternula elliptica	454 Life Sciences RNA-seq	ERX082057-86	49470	12961	1498	657
Mactra chinensis	Illumina RNA-seq	SRX528175	68392	26131	2378	1205
Margaritifera margaritifera	Illumina RNA-seq	SRX687769	37913	6717	845	622
Mercenaria campechiensis	Illumina RNA-seq	SRX644681	19500	4990	714	642
Meretrix meretrix	Illumina RNA-seq	SRX666741-4	41719	21494	2358	1101
Mimachlamys nobilis	454 Life Sciences RNA-seq	SRX253988	20209	8064	1151	787
Mizuhopecten yessoensis	Illumina RNA-seq	SRX220583; SRX221165	117295	31182	2623	1475
Mya arenaria	Illumina RNA-seq	SRX687786	78336	23331	2283	865
Myochama anomioides	Illumina RNA-seq	SRX644684	36708	8585	914	590
Mytilus californianus	Illumina RNA-seq	SRX565219-20	49701	27275	2362	1184
Mytilus edulis	Illumina RNA-seq	SRX565221-4	91867	50424	2517	1189
Mytilus galloprovincialis	Illumina RNA-seq	SRX126947-50; SRX565225-30	266920	76338	2503	1201
Mytilus trossulus	Illumina RNA-seq	SRX565231-2	70389	38592	2192	800
Neotrigonia margaritacea	Illumina RNA-seq	SRX644685	55140	15684	1755	863
Ostrea chilensis	Illumina RNA-seq	SRX565248-9	18770	10774	1751	716
Ostrea edulis	Illumina RNA-seq	SRX565250-9	57360	22124	2350	921
Ostrea lurida	Illumina RNA-seq	SRX175407	41206	16537	2338	1037
Ostreola stentina	Illumina RNA-seq	SRX565260-1	12206	5690	958	564
Pecten maximus	Illumina RNA-seq	SRX497464	37485	18440	2335	1162
Perna viridis	Illumina RNA-seq	SRX643367; SRX643380-5	87853	30362	2657	1539
Pinctada fucata	Genome sequencing	/	/	/	2141	1038
Pinctada martensii	Illumina RNA-seq	SRX268302	28816	20959	2388	887
Pinctada maxima	454 Life Sciences RNA-seq	SRX219206	81045	8878	893	515
Placopecten magellanicus	Illumina RNA-seq	SRX687766	30848	12109	1794	937
Polymesoda caroliniana	Illumina RNA-seq	SRX687784	46864	9842	1116	675
Pyganodon grandis	Illumina RNA-seq	SRX310669-84	86957	23128	2846	1539
Ruditapes decussatus	Illumina RNA-seq	SRX348803-8	88151	34218	2846	1189
Ruditapes philippinarum	Illumina RNA-seq	SRX076440-63	68215	22854	2211	928
Saccostrea glomerata	454 Life Sciences RNA-seq	SRX616573	53280	21178	2217	798
Sinonovacula constricta	Illumina RNA-seq	SRX1149452; SRX999924-26-28-29	110993	39489	2527	1291
Solemya velum	Illumina RNA-seq	SRX091478	51268	20777	2846	1590
Sphaerium nucleus	Illumina RNA-seq	SRX687787	64093	16043	1144	520
Tegillarca granosa	454 Life Sciences RNA-seq	SRX144778	22744	11532	1370	761
Uniomerus tetralasmus	Illumina RNA-seq	SRX310669-97	123694	26434	2612	1530
Villosa lienosa	Illumina RNA-seq	SRX101836-9	125347	28113	2245	840
