# Supplementary material for: Analysis of synonymous codon usage patterns in sixty-four different bivalve species
Source: PeerJ. 2015 Dec 14;3:e1520. doi: 10.7717/peerj.1520 (PMC4690358; doi:10.7717/peerj.1520)
Supplement: Table S3 — Codon frequencies calculated for the 64 bivalve species analyzed in the present study. [file peerj-03-1520-s003.xlsx]

## Sheet: Sheet1
Codon	Anadara trapezia	Astarte sulcata	Arctica islandica	Argopecten iradians	Atrina rigida	Azumapecten farreri	Bathymodiolus azoricus	Bathymodiolus platifrons	Cardites antiquata	Cerastoderma edule	Corbicula fluminea	Crassostrea angulata	Crassostrea corteziensis	Crassostrea gigas	Crassostrea hongkongensis	Crassostrea virginica	Cycladicama cumingii	Cyrenoida floridana	Diplodonta	Donacilla cornea	Ellipto complanata	Ennucula tenuis	Eucassatrella cumingii	Galeomma turtoni	Geukensia demissa	Glossus humanus	Hiatella arctica	Lampsilis cardium	Lamychaena hians	Laternula elliptica	Mactra chinensis	Margaritifera margaritifera	Mercenaria campechiensis	Meretrix meretrix	Mimachlamys nobilis	Mizuhopecten yessoensis	Mya arenaria	Myochama anomioides	Mytilus californianus	Mytilus edulis	Mytilus galloprovincialis	Mytilus trossulus	Neotrigonia margaritacea	Ostrea chilensis	Ostrea edulis	Ostrea lurida	Ostreola stentina	Pecten maximus	Perna viridis
GCA - Ala	0.369	0.314	0.34	0.265	0.388	0.284	0.37	0.358	0.347	0.375	0.335	0.285	0.3	0.278	0.286	0.279	0.452	0.354	0.425	0.26	0.38	0.306	0.353	0.256	0.351	0.293	0.288	0.379	0.347	0.267	0.268	0.368	0.375	0.384	0.282	0.287	0.284	0.25	0.383	0.373	0.37	0.373	0.339	0.331	0.32	0.285	0.314	0.301	0.328
GCC - Ala	0.18	0.315	0.247	0.294	0.19	0.29	0.205	0.186	0.265	0.196	0.234	0.324	0.312	0.33	0.324	0.336	0.155	0.24	0.174	0.232	0.256	0.277	0.274	0.317	0.223	0.271	0.296	0.249	0.249	0.299	0.128	0.262	0.197	0.21	0.288	0.308	0.309	0.347	0.174	0.179	0.183	0.184	0.253	0.267	0.279	0.306	0.281	0.287	0.198
GCG - Ala	0.041	0.072	0.084	0.08	0.053	0.091	0.031	0.032	0.058	0.064	0.072	0.081	0.064	0.085	0.073	0.077	0.041	0.063	0.065	0.085	0.035	0.097	0.047	0.129	0.031	0.118	0.087	0.035	0.068	0.1	0.03	0.037	0.065	0.058	0.072	0.088	0.123	0.136	0.026	0.028	0.028	0.027	0.048	0.074	0.074	0.1	0.098	0.072	0.028
GCT - Ala	0.41	0.299	0.329	0.361	0.369	0.334	0.393	0.423	0.33	0.364	0.359	0.31	0.324	0.307	0.317	0.307	0.353	0.343	0.336	0.422	0.329	0.32	0.326	0.297	0.394	0.317	0.329	0.337	0.336	0.334	0.575	0.333	0.363	0.348	0.358	0.317	0.284	0.268	0.417	0.419	0.419	0.417	0.359	0.328	0.328	0.309	0.307	0.34	0.446
TGC - Cys	0.146	0.276	0.251	0.215	0.23	0.255	0.158	0.133	0.263	0.245	0.284	0.295	0.303	0.296	0.289	0.311	0.283	0.256	0.298	0.228	0.324	0.332	0.266	0.331	0.159	0.221	0.177	0.334	0.235	0.284	0.092	0.323	0.246	0.262	0.218	0.235	0.366	0.35	0.156	0.151	0.155	0.155	0.279	0.301	0.298	0.297	0.312	0.222	0.169
TGT - Cys	0.854	0.724	0.749	0.785	0.77	0.745	0.842	0.867	0.737	0.755	0.716	0.705	0.697	0.704	0.711	0.689	0.717	0.744	0.702	0.772	0.676	0.668	0.734	0.669	0.841	0.779	0.823	0.666	0.765	0.716	0.908	0.677	0.754	0.738	0.782	0.765	0.634	0.65	0.844	0.849	0.845	0.845	0.721	0.699	0.702	0.703	0.688	0.778	0.831
GAC - Asp	0.291	0.47	0.4	0.474	0.33	0.481	0.327	0.312	0.426	0.366	0.413	0.485	0.458	0.492	0.48	0.482	0.295	0.391	0.325	0.312	0.373	0.458	0.429	0.478	0.331	0.407	0.419	0.367	0.435	0.47	0.191	0.365	0.366	0.381	0.46	0.523	0.533	0.506	0.294	0.303	0.305	0.307	0.374	0.428	0.438	0.481	0.454	0.473	0.31
GAT - Asp	0.709	0.53	0.6	0.526	0.67	0.519	0.673	0.688	0.574	0.634	0.587	0.515	0.542	0.508	0.52	0.518	0.705	0.609	0.675	0.688	0.627	0.542	0.571	0.522	0.669	0.593	0.581	0.633	0.565	0.53	0.809	0.635	0.634	0.619	0.54	0.477	0.467	0.494	0.706	0.697	0.695	0.693	0.626	0.572	0.562	0.519	0.546	0.527	0.69
GAA - Glu	0.709	0.515	0.536	0.51	0.654	0.493	0.709	0.706	0.543	0.597	0.53	0.474	0.48	0.467	0.475	0.473	0.705	0.566	0.688	0.605	0.522	0.55	0.532	0.432	0.679	0.535	0.521	0.541	0.534	0.478	0.723	0.527	0.597	0.567	0.525	0.463	0.406	0.456	0.712	0.706	0.699	0.703	0.515	0.541	0.53	0.505	0.538	0.5	0.644
GAG - Glu	0.291	0.485	0.464	0.49	0.346	0.507	0.291	0.294	0.457	0.403	0.47	0.526	0.52	0.533	0.525	0.527	0.295	0.434	0.312	0.395	0.478	0.45	0.468	0.568	0.321	0.465	0.479	0.459	0.466	0.522	0.277	0.473	0.403	0.433	0.475	0.537	0.594	0.544	0.288	0.294	0.301	0.297	0.485	0.459	0.47	0.495	0.462	0.5	0.356
TTC - Phe	0.292	0.482	0.458	0.483	0.338	0.471	0.311	0.299	0.486	0.42	0.46	0.46	0.443	0.466	0.464	0.462	0.373	0.425	0.418	0.431	0.413	0.418	0.458	0.487	0.346	0.432	0.406	0.406	0.438	0.492	0.27	0.431	0.422	0.418	0.46	0.496	0.521	0.594	0.315	0.316	0.32	0.321	0.421	0.432	0.432	0.468	0.446	0.471	0.355
TTT - Phe	0.708	0.518	0.542	0.517	0.662	0.529	0.689	0.701	0.514	0.58	0.54	0.54	0.557	0.534	0.536	0.538	0.627	0.575	0.582	0.569	0.587	0.582	0.542	0.513	0.654	0.568	0.594	0.594	0.562	0.508	0.73	0.569	0.578	0.582	0.54	0.504	0.479	0.406	0.685	0.684	0.68	0.679	0.579	0.568	0.568	0.532	0.554	0.529	0.645
GGA - Gly	0.423	0.355	0.353	0.377	0.427	0.363	0.43	0.45	0.373	0.378	0.358	0.397	0.396	0.39	0.405	0.386	0.398	0.361	0.389	0.325	0.391	0.342	0.357	0.284	0.444	0.343	0.324	0.399	0.349	0.363	0.344	0.398	0.377	0.361	0.392	0.343	0.293	0.302	0.455	0.452	0.449	0.455	0.401	0.418	0.411	0.402	0.433	0.372	0.41
GGC - Gly	0.1	0.198	0.172	0.197	0.139	0.2	0.12	0.099	0.178	0.15	0.178	0.172	0.172	0.173	0.169	0.18	0.149	0.148	0.159	0.134	0.164	0.204	0.184	0.25	0.111	0.17	0.174	0.16	0.167	0.189	0.067	0.161	0.151	0.152	0.18	0.21	0.251	0.263	0.1	0.105	0.105	0.102	0.152	0.154	0.159	0.177	0.158	0.192	0.11
GGG - Gly	0.098	0.171	0.143	0.14	0.11	0.155	0.114	0.104	0.144	0.122	0.139	0.214	0.21	0.219	0.207	0.227	0.096	0.146	0.097	0.121	0.167	0.182	0.168	0.166	0.104	0.156	0.135	0.156	0.13	0.15	0.064	0.163	0.122	0.148	0.136	0.178	0.207	0.204	0.101	0.103	0.104	0.099	0.165	0.182	0.187	0.195	0.178	0.156	0.125
GGT - Gly	0.379	0.275	0.332	0.286	0.324	0.282	0.337	0.347	0.306	0.35	0.325	0.217	0.222	0.218	0.219	0.207	0.357	0.345	0.355	0.42	0.279	0.272	0.291	0.3	0.341	0.331	0.367	0.286	0.353	0.298	0.525	0.278	0.35	0.339	0.291	0.269	0.249	0.23	0.345	0.341	0.342	0.343	0.283	0.246	0.243	0.227	0.231	0.28	0.355
CAC - His	0.301	0.487	0.388	0.481	0.353	0.494	0.307	0.284	0.432	0.344	0.424	0.509	0.48	0.514	0.506	0.505	0.277	0.373	0.303	0.313	0.384	0.454	0.441	0.494	0.336	0.406	0.35	0.387	0.408	0.475	0.135	0.407	0.349	0.35	0.47	0.522	0.538	0.507	0.274	0.268	0.271	0.272	0.379	0.471	0.469	0.509	0.491	0.482	0.3
CAT - His	0.699	0.513	0.612	0.519	0.647	0.506	0.693	0.716	0.568	0.656	0.576	0.491	0.52	0.486	0.494	0.495	0.723	0.627	0.697	0.687	0.616	0.546	0.559	0.506	0.664	0.594	0.65	0.613	0.592	0.525	0.865	0.593	0.651	0.65	0.53	0.478	0.462	0.493	0.726	0.732	0.729	0.728	0.621	0.529	0.531	0.491	0.509	0.518	0.7
ATA - Ile	0.441	0.31	0.35	0.27	0.352	0.27	0.392	0.416	0.329	0.358	0.322	0.248	0.238	0.244	0.243	0.231	0.364	0.335	0.354	0.343	0.287	0.312	0.325	0.234	0.376	0.381	0.427	0.286	0.368	0.226	0.492	0.283	0.359	0.378	0.265	0.288	0.258	0.248	0.419	0.427	0.425	0.428	0.284	0.249	0.255	0.237	0.236	0.29	0.381
ATC - Ile	0.181	0.325	0.308	0.387	0.224	0.387	0.195	0.18	0.298	0.256	0.323	0.366	0.352	0.374	0.368	0.377	0.196	0.29	0.222	0.281	0.287	0.287	0.291	0.367	0.211	0.307	0.276	0.278	0.267	0.405	0.146	0.297	0.256	0.248	0.373	0.388	0.4	0.425	0.181	0.183	0.185	0.186	0.295	0.321	0.327	0.367	0.354	0.373	0.206
ATT - Ile	0.378	0.365	0.341	0.343	0.425	0.343	0.413	0.403	0.373	0.386	0.355	0.387	0.41	0.382	0.389	0.392	0.441	0.374	0.424	0.376	0.425	0.401	0.384	0.399	0.414	0.312	0.297	0.435	0.365	0.369	0.362	0.42	0.384	0.374	0.362	0.324	0.342	0.327	0.4	0.39	0.39	0.386	0.421	0.43	0.418	0.395	0.41	0.337	0.413
AAA - Lys	0.678	0.485	0.547	0.516	0.654	0.506	0.639	0.657	0.509	0.583	0.516	0.523	0.532	0.574	0.52	0.523	0.626	0.529	0.623	0.587	0.507	0.537	0.498	0.413	0.641	0.544	0.525	0.517	0.514	0.466	0.698	0.505	0.582	0.565	0.517	0.485	0.42	0.427	0.664	0.666	0.675	0.665	0.528	0.561	0.562	0.546	0.568	0.509	0.622
AAG - Lys	0.322	0.515	0.453	0.484	0.346	0.494	0.361	0.343	0.491	0.417	0.484	0.477	0.468	0.426	0.48	0.477	0.374	0.471	0.377	0.413	0.493	0.463	0.502	0.587	0.359	0.456	0.475	0.483	0.486	0.534	0.302	0.495	0.418	0.435	0.483	0.515	0.58	0.573	0.336	0.334	0.325	0.335	0.472	0.439	0.438	0.454	0.432	0.491	0.378
CTA - Leu	0.126	0.097	0.118	0.135	0.12	0.128	0.122	0.127	0.102	0.113	0.112	0.115	0.108	0.114	0.115	0.106	0.094	0.103	0.097	0.116	0.109	0.102	0.098	0.086	0.108	0.124	0.161	0.109	0.107	0.115	0.129	0.111	0.111	0.11	0.13	0.125	0.1	0.102	0.115	0.119	0.118	0.115	0.113	0.114	0.114	0.114	0.108	0.125	0.118
CTC - Leu	0.055	0.106	0.131	0.155	0.072	0.155	0.057	0.053	0.095	0.104	0.122	0.137	0.137	0.14	0.135	0.142	0.068	0.083	0.084	0.089	0.098	0.101	0.092	0.147	0.065	0.128	0.123	0.092	0.1	0.13	0.041	0.1	0.104	0.093	0.149	0.163	0.175	0.144	0.054	0.057	0.058	0.057	0.097	0.12	0.123	0.133	0.127	0.153	0.069
CTG - Leu	0.122	0.293	0.238	0.255	0.162	0.261	0.132	0.136	0.267	0.19	0.259	0.297	0.289	0.302	0.299	0.305	0.156	0.258	0.16	0.171	0.254	0.309	0.272	0.321	0.172	0.226	0.204	0.245	0.238	0.291	0.065	0.253	0.191	0.221	0.236	0.29	0.304	0.334	0.139	0.137	0.139	0.138	0.233	0.259	0.265	0.288	0.261	0.261	0.161
CTT - Leu	0.156	0.141	0.15	0.162	0.187	0.17	0.151	0.146	0.159	0.19	0.162	0.141	0.147	0.14	0.139	0.135	0.222	0.164	0.212	0.146	0.206	0.153	0.161	0.123	0.14	0.128	0.141	0.209	0.165	0.167	0.167	0.191	0.191	0.198	0.181	0.154	0.183	0.134	0.152	0.149	0.15	0.15	0.2	0.151	0.15	0.133	0.148	0.167	0.169
TTA - Leu	0.362	0.153	0.164	0.146	0.251	0.131	0.344	0.351	0.164	0.203	0.153	0.134	0.14	0.13	0.134	0.135	0.222	0.186	0.215	0.248	0.131	0.147	0.161	0.113	0.314	0.194	0.187	0.134	0.18	0.116	0.443	0.132	0.202	0.182	0.145	0.12	0.085	0.103	0.346	0.351	0.346	0.352	0.16	0.168	0.162	0.153	0.166	0.136	0.287
TTG - Leu	0.178	0.209	0.199	0.147	0.208	0.155	0.194	0.187	0.212	0.201	0.192	0.176	0.179	0.175	0.177	0.177	0.239	0.206	0.234	0.23	0.202	0.189	0.216	0.21	0.202	0.198	0.183	0.212	0.211	0.182	0.154	0.214	0.2	0.196	0.159	0.149	0.154	0.183	0.194	0.187	0.189	0.187	0.198	0.188	0.186	0.179	0.19	0.157	0.197
AAC - Asn	0.348	0.51	0.464	0.535	0.364	0.545	0.359	0.336	0.459	0.437	0.497	0.51	0.472	0.516	0.506	0.492	0.347	0.475	0.36	0.394	0.415	0.466	0.47	0.508	0.376	0.478	0.468	0.41	0.494	0.558	0.255	0.407	0.438	0.44	0.521	0.554	0.597	0.567	0.333	0.334	0.339	0.341	0.423	0.452	0.452	0.494	0.476	0.518	0.364
AAT - Asn	0.652	0.49	0.536	0.465	0.636	0.455	0.641	0.664	0.541	0.563	0.503	0.49	0.528	0.484	0.494	0.508	0.653	0.525	0.64	0.606	0.585	0.534	0.53	0.492	0.624	0.522	0.532	0.59	0.506	0.442	0.745	0.593	0.562	0.56	0.479	0.446	0.403	0.433	0.667	0.666	0.661	0.659	0.577	0.548	0.548	0.506	0.524	0.482	0.636
CCA - Pro	0.559	0.439	0.451	0.401	0.529	0.408	0.497	0.519	0.474	0.526	0.457	0.367	0.373	0.363	0.375	0.348	0.587	0.508	0.563	0.419	0.496	0.39	0.484	0.357	0.523	0.42	0.437	0.508	0.554	0.396	0.48	0.498	0.525	0.517	0.411	0.376	0.382	0.368	0.542	0.528	0.525	0.531	0.474	0.415	0.412	0.378	0.403	0.41	0.487
CCC - Pro	0.098	0.204	0.16	0.188	0.117	0.197	0.104	0.088	0.162	0.114	0.15	0.261	0.26	0.266	0.26	0.29	0.081	0.121	0.091	0.148	0.173	0.199	0.172	0.261	0.106	0.2	0.191	0.168	0.113	0.2	0.059	0.179	0.114	0.121	0.195	0.218	0.224	0.227	0.082	0.088	0.091	0.09	0.171	0.221	0.219	0.247	0.239	0.187	0.103
CCG - Pro	0.067	0.102	0.121	0.109	0.083	0.105	0.064	0.052	0.086	0.097	0.12	0.1	0.084	0.104	0.093	0.096	0.057	0.083	0.086	0.134	0.048	0.135	0.066	0.157	0.055	0.144	0.097	0.048	0.095	0.128	0.041	0.048	0.098	0.082	0.105	0.118	0.154	0.186	0.046	0.047	0.047	0.046	0.067	0.093	0.096	0.125	0.117	0.104	0.044
CCT - Pro	0.276	0.255	0.269	0.302	0.271	0.291	0.334	0.342	0.278	0.263	0.273	0.271	0.283	0.268	0.272	0.266	0.276	0.288	0.261	0.299	0.283	0.276	0.278	0.225	0.316	0.236	0.275	0.275	0.238	0.276	0.419	0.276	0.263	0.28	0.288	0.287	0.24	0.219	0.33	0.337	0.337	0.333	0.288	0.271	0.274	0.25	0.241	0.299	0.366
CAA - Gln	0.498	0.326	0.382	0.358	0.493	0.348	0.507	0.525	0.332	0.379	0.349	0.351	0.354	0.346	0.349	0.349	0.464	0.365	0.476	0.507	0.351	0.31	0.322	0.342	0.439	0.426	0.436	0.36	0.347	0.335	0.673	0.362	0.379	0.348	0.379	0.329	0.283	0.264	0.493	0.498	0.496	0.497	0.357	0.397	0.384	0.363	0.401	0.356	0.466
CAG - Gln	0.502	0.674	0.618	0.642	0.507	0.652	0.493	0.475	0.668	0.621	0.651	0.649	0.646	0.654	0.651	0.651	0.536	0.635	0.524	0.493	0.649	0.69	0.678	0.658	0.561	0.574	0.564	0.64	0.653	0.665	0.327	0.638	0.621	0.652	0.621	0.671	0.717	0.736	0.507	0.502	0.504	0.503	0.643	0.603	0.616	0.637	0.599	0.644	0.534
AGA - Arg	0.544	0.374	0.438	0.289	0.468	0.273	0.55	0.56	0.386	0.454	0.398	0.35	0.343	0.344	0.352	0.33	0.515	0.412	0.483	0.449	0.376	0.303	0.383	0.246	0.518	0.387	0.389	0.393	0.469	0.31	0.601	0.386	0.454	0.425	0.296	0.257	0.244	0.285	0.571	0.563	0.56	0.573	0.392	0.385	0.375	0.352	0.375	0.284	0.54
AGG - Arg	0.151	0.255	0.17	0.194	0.161	0.209	0.147	0.159	0.243	0.17	0.178	0.235	0.229	0.237	0.235	0.233	0.164	0.169	0.156	0.15	0.234	0.173	0.259	0.198	0.169	0.168	0.162	0.227	0.206	0.154	0.09	0.233	0.172	0.207	0.198	0.213	0.19	0.18	0.167	0.166	0.168	0.164	0.211	0.21	0.213	0.218	0.205	0.202	0.205
CGA - Arg	0.106	0.112	0.128	0.167	0.149	0.158	0.101	0.108	0.12	0.125	0.147	0.14	0.148	0.139	0.142	0.148	0.11	0.154	0.123	0.128	0.133	0.169	0.108	0.173	0.14	0.152	0.123	0.128	0.102	0.18	0.069	0.126	0.124	0.113	0.16	0.161	0.147	0.168	0.106	0.108	0.106	0.111	0.129	0.153	0.153	0.162	0.156	0.165	0.1
CGC - Arg	0.03	0.067	0.053	0.092	0.046	0.115	0.031	0.021	0.058	0.047	0.066	0.091	0.093	0.093	0.089	0.099	0.042	0.048	0.049	0.046	0.068	0.089	0.06	0.118	0.025	0.06	0.065	0.065	0.045	0.089	0.02	0.071	0.045	0.053	0.084	0.108	0.13	0.099	0.022	0.021	0.023	0.018	0.059	0.072	0.074	0.078	0.079	0.092	0.024
CGG - Arg	0.049	0.083	0.072	0.091	0.055	0.091	0.055	0.037	0.078	0.054	0.075	0.092	0.09	0.094	0.088	0.097	0.044	0.065	0.051	0.05	0.074	0.128	0.075	0.102	0.042	0.073	0.064	0.07	0.053	0.088	0.021	0.072	0.055	0.062	0.094	0.113	0.131	0.148	0.034	0.037	0.038	0.035	0.077	0.078	0.082	0.091	0.079	0.101	0.039
CGT - Arg	0.12	0.109	0.139	0.166	0.121	0.154	0.117	0.115	0.115	0.149	0.137	0.092	0.097	0.094	0.095	0.093	0.125	0.152	0.139	0.178	0.115	0.139	0.116	0.163	0.106	0.16	0.196	0.117	0.126	0.179	0.2	0.112	0.149	0.141	0.167	0.148	0.159	0.12	0.1	0.104	0.105	0.099	0.133	0.102	0.103	0.099	0.107	0.156	0.093
AGC - Ser	0.074	0.124	0.112	0.113	0.097	0.131	0.077	0.067	0.114	0.103	0.128	0.137	0.135	0.138	0.136	0.141	0.101	0.113	0.11	0.098	0.136	0.137	0.119	0.146	0.076	0.107	0.087	0.136	0.109	0.141	0.044	0.14	0.106	0.11	0.121	0.129	0.167	0.16	0.069	0.066	0.068	0.067	0.124	0.126	0.128	0.137	0.134	0.119	0.078
AGT - Ser	0.275	0.232	0.247	0.24	0.254	0.229	0.271	0.278	0.245	0.255	0.232	0.215	0.217	0.213	0.216	0.212	0.256	0.245	0.248	0.255	0.235	0.226	0.246	0.211	0.277	0.244	0.265	0.234	0.247	0.217	0.304	0.232	0.253	0.256	0.24	0.231	0.186	0.209	0.277	0.279	0.28	0.281	0.239	0.222	0.222	0.214	0.209	0.238	0.272
TCA - Ser	0.298	0.222	0.244	0.211	0.275	0.217	0.293	0.294	0.243	0.273	0.236	0.198	0.203	0.193	0.2	0.187	0.317	0.261	0.294	0.235	0.244	0.197	0.237	0.192	0.285	0.215	0.232	0.243	0.284	0.203	0.298	0.241	0.272	0.276	0.217	0.2	0.215	0.175	0.305	0.301	0.301	0.301	0.23	0.22	0.216	0.199	0.215	0.215	0.282
TCC - Ser	0.094	0.178	0.13	0.164	0.117	0.164	0.088	0.08	0.15	0.103	0.147	0.197	0.197	0.201	0.196	0.215	0.083	0.126	0.1	0.127	0.157	0.174	0.159	0.177	0.114	0.143	0.136	0.152	0.119	0.163	0.059	0.153	0.103	0.109	0.162	0.177	0.184	0.19	0.09	0.091	0.091	0.092	0.159	0.173	0.173	0.189	0.176	0.167	0.093
TCG - Ser	0.038	0.056	0.077	0.071	0.051	0.069	0.04	0.039	0.052	0.059	0.074	0.064	0.056	0.067	0.062	0.065	0.044	0.061	0.06	0.082	0.039	0.08	0.041	0.109	0.04	0.097	0.07	0.041	0.055	0.072	0.029	0.042	0.059	0.053	0.059	0.079	0.081	0.103	0.033	0.033	0.033	0.034	0.038	0.067	0.066	0.082	0.08	0.067	0.03
TCT - Ser	0.221	0.187	0.19	0.201	0.206	0.19	0.232	0.242	0.197	0.205	0.183	0.189	0.192	0.188	0.19	0.18	0.199	0.193	0.188	0.204	0.189	0.186	0.198	0.165	0.209	0.193	0.21	0.192	0.186	0.204	0.267	0.193	0.207	0.196	0.201	0.183	0.167	0.161	0.227	0.229	0.228	0.226	0.21	0.192	0.195	0.179	0.187	0.195	0.244
ACA - Thr	0.548	0.475	0.458	0.436	0.518	0.436	0.549	0.548	0.504	0.513	0.467	0.377	0.391	0.368	0.384	0.359	0.536	0.475	0.505	0.391	0.479	0.413	0.504	0.341	0.541	0.429	0.49	0.483	0.508	0.436	0.514	0.479	0.512	0.495	0.444	0.414	0.398	0.362	0.561	0.547	0.543	0.55	0.477	0.415	0.405	0.369	0.391	0.446	0.494
ACC - Thr	0.136	0.208	0.188	0.229	0.147	0.227	0.128	0.125	0.177	0.153	0.202	0.283	0.266	0.288	0.278	0.294	0.128	0.19	0.14	0.189	0.201	0.22	0.191	0.252	0.16	0.219	0.189	0.198	0.158	0.236	0.093	0.211	0.154	0.167	0.219	0.245	0.24	0.245	0.128	0.136	0.139	0.136	0.191	0.225	0.233	0.258	0.244	0.221	0.152
ACG - Thr	0.059	0.117	0.117	0.113	0.081	0.119	0.087	0.069	0.095	0.084	0.097	0.106	0.093	0.109	0.1	0.112	0.06	0.092	0.096	0.125	0.062	0.14	0.079	0.2	0.057	0.139	0.107	0.06	0.097	0.127	0.044	0.067	0.085	0.084	0.112	0.124	0.145	0.202	0.049	0.051	0.053	0.051	0.078	0.114	0.111	0.147	0.141	0.103	0.046
ACT - Thr	0.256	0.201	0.238	0.222	0.254	0.218	0.236	0.259	0.224	0.25	0.234	0.234	0.249	0.236	0.237	0.234	0.276	0.243	0.259	0.295	0.258	0.228	0.226	0.207	0.243	0.214	0.215	0.258	0.237	0.2	0.348	0.243	0.25	0.254	0.224	0.217	0.218	0.191	0.262	0.266	0.265	0.262	0.253	0.246	0.251	0.226	0.224	0.23	0.308
GTA - Val	0.316	0.2	0.226	0.221	0.255	0.215	0.317	0.317	0.211	0.272	0.216	0.158	0.153	0.157	0.162	0.144	0.237	0.228	0.241	0.253	0.2	0.177	0.211	0.146	0.285	0.244	0.282	0.206	0.237	0.193	0.37	0.203	0.274	0.23	0.23	0.188	0.15	0.141	0.312	0.308	0.308	0.311	0.211	0.183	0.18	0.166	0.179	0.21	0.281
GTC - Val	0.145	0.218	0.179	0.219	0.174	0.221	0.148	0.146	0.201	0.144	0.173	0.242	0.231	0.245	0.24	0.239	0.123	0.179	0.14	0.162	0.189	0.192	0.196	0.184	0.165	0.191	0.189	0.182	0.168	0.244	0.095	0.186	0.144	0.152	0.216	0.229	0.218	0.253	0.139	0.141	0.145	0.144	0.203	0.21	0.213	0.23	0.225	0.215	0.159
GTG - Val	0.196	0.332	0.328	0.331	0.238	0.339	0.208	0.195	0.31	0.274	0.341	0.372	0.37	0.372	0.371	0.39	0.26	0.314	0.271	0.273	0.313	0.379	0.316	0.427	0.215	0.318	0.294	0.307	0.303	0.31	0.157	0.319	0.274	0.304	0.317	0.373	0.383	0.385	0.2	0.205	0.206	0.201	0.298	0.35	0.355	0.378	0.352	0.342	0.201
GTT - Val	0.343	0.251	0.267	0.229	0.333	0.225	0.328	0.342	0.279	0.31	0.27	0.228	0.246	0.225	0.227	0.228	0.381	0.28	0.348	0.312	0.299	0.251	0.278	0.242	0.335	0.247	0.235	0.304	0.291	0.253	0.377	0.292	0.308	0.315	0.237	0.209	0.249	0.22	0.349	0.345	0.34	0.344	0.288	0.257	0.252	0.226	0.243	0.234	0.359
TAC - Tyr	0.345	0.559	0.475	0.558	0.411	0.58	0.357	0.342	0.499	0.446	0.509	0.554	0.523	0.562	0.551	0.55	0.405	0.486	0.403	0.404	0.459	0.494	0.512	0.582	0.383	0.464	0.432	0.458	0.485	0.565	0.222	0.455	0.449	0.471	0.552	0.591	0.612	0.595	0.338	0.341	0.345	0.344	0.454	0.512	0.513	0.563	0.549	0.548	0.38
TAT - Tyr	0.655	0.441	0.525	0.442	0.589	0.42	0.643	0.658	0.501	0.554	0.491	0.446	0.477	0.438	0.449	0.45	0.595	0.514	0.597	0.596	0.541	0.506	0.488	0.418	0.617	0.536	0.568	0.542	0.515	0.435	0.778	0.545	0.551	0.529	0.448	0.409	0.388	0.405	0.662	0.659	0.655	0.656	0.546	0.488	0.487	0.437	0.451	0.452	0.62
TAA - STOP	0.45	0.311	0.324	0.315	0.366	0.272	0.392	0.397	0.285	0.363	0.337	0.327	0.342	0.36	0.318	0.315	0.291	0.379	0.35	0.399	0.324	0.297	0.295	0.281	0.404	0.357	0.333	0.379	0.34	0.333	0.366	0.411	0.359	0.328	0.293	0.26	0.265	0.344	0.402	0.398	0.405	0.396	0.326	0.344	0.347	0.311	0.364	0.289	0.362
TAG - STOP	0.175	0.245	0.243	0.221	0.194	0.238	0.187	0.172	0.229	0.22	0.231	0.209	0.196	0.201	0.212	0.2	0.196	0.269	0.232	0.217	0.215	0.228	0.196	0.248	0.224	0.254	0.219	0.209	0.27	0.258	0.209	0.217	0.217	0.235	0.318	0.241	0.267	0.31	0.183	0.182	0.196	0.18	0.229	0.193	0.192	0.213	0.243	0.238	0.205
TGA - STOP	0.375	0.444	0.432	0.464	0.441	0.49	0.421	0.431	0.486	0.417	0.433	0.464	0.461	0.438	0.47	0.485	0.513	0.352	0.418	0.384	0.461	0.475	0.509	0.471	0.373	0.388	0.448	0.413	0.39	0.41	0.425	0.372	0.424	0.437	0.389	0.498	0.467	0.347	0.414	0.42	0.399	0.424	0.446	0.463	0.46	0.476	0.394	0.474	0.434
[truncated: 15 more columns]
