# Supplementary material for: Analysis of synonymous codon usage patterns in sixty-four different bivalve species
Source: PeerJ. 2015 Dec 14;3:e1520. doi: 10.7717/peerj.1520 (PMC4690358; doi:10.7717/peerj.1520)
Supplement: Table S4 — RSCU values calculated for the 64 bivalve species analyzed in the present study. [file peerj-03-1520-s004.xlsx]

## Sheet: Sheet1
Codon	Anadara trapezia	Astarte sulcata	Arctica islandica	Argopecten iradians	Atrina rigida	Azumapecten farreri	Bathymodiolus azoricus	Bathymodiolus platifrons	Cardites antiquata	Cerastoderma edule	Corbicula fluminea	Crassostrea angulata	Crassostrea corteziensis	Crassostrea gigas	Crassostrea hongkongensis	Crassostrea virginica	Cycladicama cumingii	Cyrenoida floridana	Diplodonta	Donacilla cornea	Ellipto complanata	Ennucula tenuis	Eucassatrella cumingii	Galeomma turtoni	Geukensia demissa	Glossus humanus	Hiatella arctica	Lampsilis cardium	Lamychaena hians	Laternula elliptica	Mactra chinensis	Margaritifera margaritifera	Mercenaria campechiensis	Meretrix meretrix	Mimachlamys nobilis	Mizuhopecten yessoensis	Mya arenaria	Myochama anomioides	Mytilus californianus	Mytilus edulis	Mytilus galloprovincialis	Mytilus trossulus	Neotrigonia margaritacea	Ostrea chilensis	Ostrea edulis	Ostrea lurida	Ostreola stentina	Pecten maximus	Perna viridis
GCA - Ala	1.476	1.256	1.36	1.06	1.552	1.136	1.48	1.432	1.388	1.5	1.34	1.14	1.2	1.112	1.144	1.116	1.808	1.416	1.7	1.04	1.52	1.224	1.412	1.024	1.404	1.172	1.152	1.516	1.388	1.068	1.072	1.472	1.5	1.536	1.128	1.148	1.136	1	1.532	1.492	1.48	1.492	1.356	1.324	1.28	1.14	1.256	1.204	1.312
GCC - Ala	0.72	1.26	0.988	1.176	0.76	1.16	0.82	0.744	1.06	0.784	0.936	1.296	1.248	1.32	1.296	1.344	0.62	0.96	0.696	0.928	1.024	1.108	1.096	1.268	0.892	1.084	1.184	0.996	0.996	1.196	0.512	1.048	0.788	0.84	1.152	1.232	1.236	1.388	0.696	0.716	0.732	0.736	1.012	1.068	1.116	1.224	1.124	1.148	0.792
GCG - Ala	0.164	0.288	0.336	0.32	0.212	0.364	0.124	0.128	0.232	0.256	0.288	0.324	0.256	0.34	0.292	0.308	0.164	0.252	0.26	0.34	0.14	0.388	0.188	0.516	0.124	0.472	0.348	0.14	0.272	0.4	0.12	0.148	0.26	0.232	0.288	0.352	0.492	0.544	0.104	0.112	0.112	0.108	0.192	0.296	0.296	0.4	0.392	0.288	0.112
GCT - Ala	1.64	1.196	1.316	1.444	1.476	1.336	1.572	1.692	1.32	1.456	1.436	1.24	1.296	1.228	1.268	1.228	1.412	1.372	1.344	1.688	1.316	1.28	1.304	1.188	1.576	1.268	1.316	1.348	1.344	1.336	2.3	1.332	1.452	1.392	1.432	1.268	1.136	1.072	1.668	1.676	1.676	1.668	1.436	1.312	1.312	1.236	1.228	1.36	1.784
TGC - Cys	0.292	0.552	0.502	0.43	0.46	0.51	0.316	0.266	0.526	0.49	0.568	0.59	0.606	0.592	0.578	0.622	0.566	0.512	0.596	0.456	0.648	0.664	0.532	0.662	0.318	0.442	0.354	0.668	0.47	0.568	0.184	0.646	0.492	0.524	0.436	0.47	0.732	0.7	0.312	0.302	0.31	0.31	0.558	0.602	0.596	0.594	0.624	0.444	0.338
TGT - Cys	1.708	1.448	1.498	1.57	1.54	1.49	1.684	1.734	1.474	1.51	1.432	1.41	1.394	1.408	1.422	1.378	1.434	1.488	1.404	1.544	1.352	1.336	1.468	1.338	1.682	1.558	1.646	1.332	1.53	1.432	1.816	1.354	1.508	1.476	1.564	1.53	1.268	1.3	1.688	1.698	1.69	1.69	1.442	1.398	1.404	1.406	1.376	1.556	1.662
GAC - Asp	0.582	0.94	0.8	0.948	0.66	0.962	0.654	0.624	0.852	0.732	0.826	0.97	0.916	0.984	0.96	0.964	0.59	0.782	0.65	0.624	0.746	0.916	0.858	0.956	0.662	0.814	0.838	0.734	0.87	0.94	0.382	0.73	0.732	0.762	0.92	1.046	1.066	1.012	0.588	0.606	0.61	0.614	0.748	0.856	0.876	0.962	0.908	0.946	0.62
GAT - Asp	1.418	1.06	1.2	1.052	1.34	1.038	1.346	1.376	1.148	1.268	1.174	1.03	1.084	1.016	1.04	1.036	1.41	1.218	1.35	1.376	1.254	1.084	1.142	1.044	1.338	1.186	1.162	1.266	1.13	1.06	1.618	1.27	1.268	1.238	1.08	0.954	0.934	0.988	1.412	1.394	1.39	1.386	1.252	1.144	1.124	1.038	1.092	1.054	1.38
GAA - Glu	1.418	1.03	1.072	1.02	1.308	0.986	1.418	1.412	1.086	1.194	1.06	0.948	0.96	0.934	0.95	0.946	1.41	1.132	1.376	1.21	1.044	1.1	1.064	0.864	1.358	1.07	1.042	1.082	1.068	0.956	1.446	1.054	1.194	1.134	1.05	0.926	0.812	0.912	1.424	1.412	1.398	1.406	1.03	1.082	1.06	1.01	1.076	1	1.288
GAG - Glu	0.582	0.97	0.928	0.98	0.692	1.014	0.582	0.588	0.914	0.806	0.94	1.052	1.04	1.066	1.05	1.054	0.59	0.868	0.624	0.79	0.956	0.9	0.936	1.136	0.642	0.93	0.958	0.918	0.932	1.044	0.554	0.946	0.806	0.866	0.95	1.074	1.188	1.088	0.576	0.588	0.602	0.594	0.97	0.918	0.94	0.99	0.924	1	0.712
TTC - Phe	0.584	0.964	0.916	0.966	0.676	0.942	0.622	0.598	0.972	0.84	0.92	0.92	0.886	0.932	0.928	0.924	0.746	0.85	0.836	0.862	0.826	0.836	0.916	0.974	0.692	0.864	0.812	0.812	0.876	0.984	0.54	0.862	0.844	0.836	0.92	0.992	1.042	1.188	0.63	0.632	0.64	0.642	0.842	0.864	0.864	0.936	0.892	0.942	0.71
TTT - Phe	1.416	1.036	1.084	1.034	1.324	1.058	1.378	1.402	1.028	1.16	1.08	1.08	1.114	1.068	1.072	1.076	1.254	1.15	1.164	1.138	1.174	1.164	1.084	1.026	1.308	1.136	1.188	1.188	1.124	1.016	1.46	1.138	1.156	1.164	1.08	1.008	0.958	0.812	1.37	1.368	1.36	1.358	1.158	1.136	1.136	1.064	1.108	1.058	1.29
GGA - Gly	1.692	1.42	1.412	1.508	1.708	1.452	1.72	1.8	1.492	1.512	1.432	1.588	1.584	1.56	1.62	1.544	1.592	1.444	1.556	1.3	1.564	1.368	1.428	1.136	1.776	1.372	1.296	1.596	1.396	1.452	1.376	1.592	1.508	1.444	1.568	1.372	1.172	1.208	1.82	1.808	1.796	1.82	1.604	1.672	1.644	1.608	1.732	1.488	1.64
GGC - Gly	0.4	0.792	0.688	0.788	0.556	0.8	0.48	0.396	0.712	0.6	0.712	0.688	0.688	0.692	0.676	0.72	0.596	0.592	0.636	0.536	0.656	0.816	0.736	1	0.444	0.68	0.696	0.64	0.668	0.756	0.268	0.644	0.604	0.608	0.72	0.84	1.004	1.052	0.4	0.42	0.42	0.408	0.608	0.616	0.636	0.708	0.632	0.768	0.44
GGG - Gly	0.392	0.684	0.572	0.56	0.44	0.62	0.456	0.416	0.576	0.488	0.556	0.856	0.84	0.876	0.828	0.908	0.384	0.584	0.388	0.484	0.668	0.728	0.672	0.664	0.416	0.624	0.54	0.624	0.52	0.6	0.256	0.652	0.488	0.592	0.544	0.712	0.828	0.816	0.404	0.412	0.416	0.396	0.66	0.728	0.748	0.78	0.712	0.624	0.5
GGT - Gly	1.516	1.1	1.328	1.144	1.296	1.128	1.348	1.388	1.224	1.4	1.3	0.868	0.888	0.872	0.876	0.828	1.428	1.38	1.42	1.68	1.116	1.088	1.164	1.2	1.364	1.324	1.468	1.144	1.412	1.192	2.1	1.112	1.4	1.356	1.164	1.076	0.996	0.92	1.38	1.364	1.368	1.372	1.132	0.984	0.972	0.908	0.924	1.12	1.42
CAC - His	0.602	0.974	0.776	0.962	0.706	0.988	0.614	0.568	0.864	0.688	0.848	1.018	0.96	1.028	1.012	1.01	0.554	0.746	0.606	0.626	0.768	0.908	0.882	0.988	0.672	0.812	0.7	0.774	0.816	0.95	0.27	0.814	0.698	0.7	0.94	1.044	1.076	1.014	0.548	0.536	0.542	0.544	0.758	0.942	0.938	1.018	0.982	0.964	0.6
CAT - His	1.398	1.026	1.224	1.038	1.294	1.012	1.386	1.432	1.136	1.312	1.152	0.982	1.04	0.972	0.988	0.99	1.446	1.254	1.394	1.374	1.232	1.092	1.118	1.012	1.328	1.188	1.3	1.226	1.184	1.05	1.73	1.186	1.302	1.3	1.06	0.956	0.924	0.986	1.452	1.464	1.458	1.456	1.242	1.058	1.062	0.982	1.018	1.036	1.4
ATA - Ile	1.33636	0.939394	1.06061	0.818182	1.06667	0.818182	1.18788	1.26061	0.99697	1.08485	0.975758	0.751515	0.721212	0.739394	0.736364	0.7	1.10303	1.01515	1.07273	1.03939	0.869697	0.945455	0.984848	0.709091	1.13939	1.15455	1.29394	0.866667	1.11515	0.684848	1.49091	0.857576	1.08788	1.14545	0.80303	0.872727	0.781818	0.751515	1.2697	1.29394	1.28788	1.29697	0.860606	0.754545	0.772727	0.718182	0.715152	0.878788	1.15455
ATC - Ile	0.548485	0.984848	0.933333	1.17273	0.678788	1.17273	0.590909	0.545455	0.90303	0.775758	0.978788	1.10909	1.06667	1.13333	1.11515	1.14242	0.593939	0.878788	0.672727	0.851515	0.869697	0.869697	0.881818	1.11212	0.639394	0.930303	0.836364	0.842424	0.809091	1.22727	0.442424	0.9	0.775758	0.751515	1.1303	1.17576	1.21212	1.28788	0.548485	0.554545	0.560606	0.563636	0.893939	0.972727	0.990909	1.11212	1.07273	1.1303	0.624242
ATT - Ile	1.14545	1.10606	1.03333	1.03939	1.28788	1.03939	1.25152	1.22121	1.1303	1.1697	1.07576	1.17273	1.24242	1.15758	1.17879	1.18788	1.33636	1.13333	1.28485	1.13939	1.28788	1.21515	1.16364	1.20909	1.25455	0.945455	0.9	1.31818	1.10606	1.11818	1.09697	1.27273	1.16364	1.13333	1.09697	0.981818	1.03636	0.990909	1.21212	1.18182	1.18182	1.1697	1.27576	1.30303	1.26667	1.19697	1.24242	1.02121	1.25152
AAA - Lys	1.356	0.97	1.094	1.032	1.308	1.012	1.278	1.314	1.018	1.166	1.032	1.046	1.064	1.148	1.04	1.046	1.252	1.058	1.246	1.174	1.014	1.074	0.996	0.826	1.282	1.088	1.05	1.034	1.028	0.932	1.396	1.01	1.164	1.13	1.034	0.97	0.84	0.854	1.328	1.332	1.35	1.33	1.056	1.122	1.124	1.092	1.136	1.018	1.244
AAG - Lys	0.644	1.03	0.906	0.968	0.692	0.988	0.722	0.686	0.982	0.834	0.968	0.954	0.936	0.852	0.96	0.954	0.748	0.942	0.754	0.826	0.986	0.926	1.004	1.174	0.718	0.912	0.95	0.966	0.972	1.068	0.604	0.99	0.836	0.87	0.966	1.03	1.16	1.146	0.672	0.668	0.65	0.67	0.944	0.878	0.876	0.908	0.864	0.982	0.756
CTA - Leu	0.741176	0.570588	0.694118	0.794118	0.705882	0.752941	0.717647	0.747059	0.6	0.664706	0.658824	0.676471	0.635294	0.670588	0.676471	0.623529	0.552941	0.605882	0.570588	0.682353	0.641176	0.6	0.576471	0.505882	0.635294	0.729412	0.947059	0.641176	0.629412	0.676471	0.758824	0.652941	0.652941	0.647059	0.764706	0.735294	0.588235	0.6	0.676471	0.7	0.694118	0.676471	0.664706	0.670588	0.670588	0.670588	0.635294	0.735294	0.694118
CTC - Leu	0.323529	0.623529	0.770588	0.911765	0.423529	0.911765	0.335294	0.311765	0.558824	0.611765	0.717647	0.805882	0.805882	0.823529	0.794118	0.835294	0.4	0.488235	0.494118	0.523529	0.576471	0.594118	0.541176	0.864706	0.382353	0.752941	0.723529	0.541176	0.588235	0.764706	0.241176	0.588235	0.611765	0.547059	0.876471	0.958824	1.02941	0.847059	0.317647	0.335294	0.341176	0.335294	0.570588	0.705882	0.723529	0.782353	0.747059	0.9	0.405882
CTG - Leu	0.717647	1.72353	1.4	1.5	0.952941	1.53529	0.776471	0.8	1.57059	1.11765	1.52353	1.74706	1.7	1.77647	1.75882	1.79412	0.917647	1.51765	0.941176	1.00588	1.49412	1.81765	1.6	1.88824	1.01176	1.32941	1.2	1.44118	1.4	1.71176	0.382353	1.48824	1.12353	1.3	1.38824	1.70588	1.78824	1.96471	0.817647	0.805882	0.817647	0.811765	1.37059	1.52353	1.55882	1.69412	1.53529	1.53529	0.947059
CTT - Leu	0.917647	0.829412	0.882353	0.952941	1.1	1	0.888235	0.858824	0.935294	1.11765	0.952941	0.829412	0.864706	0.823529	0.817647	0.794118	1.30588	0.964706	1.24706	0.858824	1.21176	0.9	0.947059	0.723529	0.823529	0.752941	0.829412	1.22941	0.970588	0.982353	0.982353	1.12353	1.12353	1.16471	1.06471	0.905882	1.07647	0.788235	0.894118	0.876471	0.882353	0.882353	1.17647	0.888235	0.882353	0.782353	0.870588	0.982353	0.994118
TTA - Leu	2.12941	0.9	0.964706	0.858824	1.47647	0.770588	2.02353	2.06471	0.964706	1.19412	0.9	0.788235	0.823529	0.764706	0.788235	0.794118	1.30588	1.09412	1.26471	1.45882	0.770588	0.864706	0.947059	0.664706	1.84706	1.14118	1.1	0.788235	1.05882	0.682353	2.60588	0.776471	1.18824	1.07059	0.852941	0.705882	0.5	0.605882	2.03529	2.06471	2.03529	2.07059	0.941176	0.988235	0.952941	0.9	0.976471	0.8	1.68824
TTG - Leu	1.04706	1.22941	1.17059	0.864706	1.22353	0.911765	1.14118	1.1	1.24706	1.18235	1.12941	1.03529	1.05294	1.02941	1.04118	1.04118	1.40588	1.21176	1.37647	1.35294	1.18824	1.11176	1.27059	1.23529	1.18824	1.16471	1.07647	1.24706	1.24118	1.07059	0.905882	1.25882	1.17647	1.15294	0.935294	0.876471	0.905882	1.07647	1.14118	1.1	1.11176	1.1	1.16471	1.10588	1.09412	1.05294	1.11765	0.923529	1.15882
AAC - Asn	0.696	1.02	0.928	1.07	0.728	1.09	0.718	0.672	0.918	0.874	0.994	1.02	0.944	1.032	1.012	0.984	0.694	0.95	0.72	0.788	0.83	0.932	0.94	1.016	0.752	0.956	0.936	0.82	0.988	1.116	0.51	0.814	0.876	0.88	1.042	1.108	1.194	1.134	0.666	0.668	0.678	0.682	0.846	0.904	0.904	0.988	0.952	1.036	0.728
AAT - Asn	1.304	0.98	1.072	0.93	1.272	0.91	1.282	1.328	1.082	1.126	1.006	0.98	1.056	0.968	0.988	1.016	1.306	1.05	1.28	1.212	1.17	1.068	1.06	0.984	1.248	1.044	1.064	1.18	1.012	0.884	1.49	1.186	1.124	1.12	0.958	0.892	0.806	0.866	1.334	1.332	1.322	1.318	1.154	1.096	1.096	1.012	1.048	0.964	1.272
CCA - Pro	2.236	1.756	1.804	1.604	2.116	1.632	1.988	2.076	1.896	2.104	1.828	1.468	1.492	1.452	1.5	1.392	2.348	2.032	2.252	1.676	1.984	1.56	1.936	1.428	2.092	1.68	1.748	2.032	2.216	1.584	1.92	1.992	2.1	2.068	1.644	1.504	1.528	1.472	2.168	2.112	2.1	2.124	1.896	1.66	1.648	1.512	1.612	1.64	1.948
CCC - Pro	0.392	0.816	0.64	0.752	0.468	0.788	0.416	0.352	0.648	0.456	0.6	1.044	1.04	1.064	1.04	1.16	0.324	0.484	0.364	0.592	0.692	0.796	0.688	1.044	0.424	0.8	0.764	0.672	0.452	0.8	0.236	0.716	0.456	0.484	0.78	0.872	0.896	0.908	0.328	0.352	0.364	0.36	0.684	0.884	0.876	0.988	0.956	0.748	0.412
CCG - Pro	0.268	0.408	0.484	0.436	0.332	0.42	0.256	0.208	0.344	0.388	0.48	0.4	0.336	0.416	0.372	0.384	0.228	0.332	0.344	0.536	0.192	0.54	0.264	0.628	0.22	0.576	0.388	0.192	0.38	0.512	0.164	0.192	0.392	0.328	0.42	0.472	0.616	0.744	0.184	0.188	0.188	0.184	0.268	0.372	0.384	0.5	0.468	0.416	0.176
CCT - Pro	1.104	1.02	1.076	1.208	1.084	1.164	1.336	1.368	1.112	1.052	1.092	1.084	1.132	1.072	1.088	1.064	1.104	1.152	1.044	1.196	1.132	1.104	1.112	0.9	1.264	0.944	1.1	1.1	0.952	1.104	1.676	1.104	1.052	1.12	1.152	1.148	0.96	0.876	1.32	1.348	1.348	1.332	1.152	1.084	1.096	1	0.964	1.196	1.464
CAA - Asn	0.996	0.652	0.764	0.716	0.986	0.696	1.014	1.05	0.664	0.758	0.698	0.702	0.708	0.692	0.698	0.698	0.928	0.73	0.952	1.014	0.702	0.62	0.644	0.684	0.878	0.852	0.872	0.72	0.694	0.67	1.346	0.724	0.758	0.696	0.758	0.658	0.566	0.528	0.986	0.996	0.992	0.994	0.714	0.794	0.768	0.726	0.802	0.712	0.932
CAG - Asn	1.004	1.348	1.236	1.284	1.014	1.304	0.986	0.95	1.336	1.242	1.302	1.298	1.292	1.308	1.302	1.302	1.072	1.27	1.048	0.986	1.298	1.38	1.356	1.316	1.122	1.148	1.128	1.28	1.306	1.33	0.654	1.276	1.242	1.304	1.242	1.342	1.434	1.472	1.014	1.004	1.008	1.006	1.286	1.206	1.232	1.274	1.198	1.288	1.068
AGA - Arg	3.2	2.2	2.57647	1.7	2.75294	1.60588	3.23529	3.29412	2.27059	2.67059	2.34118	2.05882	2.01765	2.02353	2.07059	1.94118	3.02941	2.42353	2.84118	2.64118	2.21176	1.78235	2.25294	1.44706	3.04706	2.27647	2.28824	2.31176	2.75882	1.82353	3.53529	2.27059	2.67059	2.5	1.74118	1.51176	1.43529	1.67647	3.35882	3.31176	3.29412	3.37059	2.30588	2.26471	2.20588	2.07059	2.20588	1.67059	3.17647
AGG - Arg	0.888235	1.5	1	1.14118	0.947059	1.22941	0.864706	0.935294	1.42941	1	1.04706	1.38235	1.34706	1.39412	1.38235	1.37059	0.964706	0.994118	0.917647	0.882353	1.37647	1.01765	1.52353	1.16471	0.994118	0.988235	0.952941	1.33529	1.21176	0.905882	0.529412	1.37059	1.01176	1.21765	1.16471	1.25294	1.11765	1.05882	0.982353	0.976471	0.988235	0.964706	1.24118	1.23529	1.25294	1.28235	1.20588	1.18824	1.20588
CGA - Arg	0.623529	0.658824	0.752941	0.982353	0.876471	0.929412	0.594118	0.635294	0.705882	0.735294	0.864706	0.823529	0.870588	0.817647	0.835294	0.870588	0.647059	0.905882	0.723529	0.752941	0.782353	0.994118	0.635294	1.01765	0.823529	0.894118	0.723529	0.752941	0.6	1.05882	0.405882	0.741176	0.729412	0.664706	0.941176	0.947059	0.864706	0.988235	0.623529	0.635294	0.623529	0.652941	0.758824	0.9	0.9	0.952941	0.917647	0.970588	0.588235
CGC - Arg	0.176471	0.394118	0.311765	0.541176	0.270588	0.676471	0.182353	0.123529	0.341176	0.276471	0.388235	0.535294	0.547059	0.547059	0.523529	0.582353	0.247059	0.282353	0.288235	0.270588	0.4	0.523529	0.352941	0.694118	0.147059	0.352941	0.382353	0.382353	0.264706	0.523529	0.117647	0.417647	0.264706	0.311765	0.494118	0.635294	0.764706	0.582353	0.129412	0.123529	0.135294	0.105882	0.347059	0.423529	0.435294	0.458824	0.464706	0.541176	0.141176
CGG - Arg	0.288235	0.488235	0.423529	0.535294	0.323529	0.535294	0.323529	0.217647	0.458824	0.317647	0.441176	0.541176	0.529412	0.552941	0.517647	0.570588	0.258824	0.382353	0.3	0.294118	0.435294	0.752941	0.441176	0.6	0.247059	0.429412	0.376471	0.411765	0.311765	0.517647	0.123529	0.423529	0.323529	0.364706	0.552941	0.664706	0.770588	0.870588	0.2	0.217647	0.223529	0.205882	0.452941	0.458824	0.482353	0.535294	0.464706	0.594118	0.229412
CGT - Arg	0.705882	0.641176	0.817647	0.976471	0.711765	0.905882	0.688235	0.676471	0.676471	0.876471	0.805882	0.541176	0.570588	0.552941	0.558824	0.547059	0.735294	0.894118	0.817647	1.04706	0.676471	0.817647	0.682353	0.958824	0.623529	0.941176	1.15294	0.688235	0.741176	1.05294	1.17647	0.658824	0.876471	0.829412	0.982353	0.870588	0.935294	0.705882	0.588235	0.611765	0.617647	0.582353	0.782353	0.6	0.605882	0.582353	0.629412	0.917647	0.547059
AGC - Ser	0.435294	0.729412	0.658824	0.664706	0.570588	0.770588	0.452941	0.394118	0.670588	0.605882	0.752941	0.805882	0.794118	0.811765	0.8	0.829412	0.594118	0.664706	0.647059	0.576471	0.8	0.805882	0.7	0.858824	0.447059	0.629412	0.511765	0.8	0.641176	0.829412	0.258824	0.823529	0.623529	0.647059	0.711765	0.758824	0.982353	0.941176	0.405882	0.388235	0.4	0.394118	0.729412	0.741176	0.752941	0.805882	0.788235	0.7	0.458824
AGT - Ser	1.61765	1.36471	1.45294	1.41176	1.49412	1.34706	1.59412	1.63529	1.44118	1.5	1.36471	1.26471	1.27647	1.25294	1.27059	1.24706	1.50588	1.44118	1.45882	1.5	1.38235	1.32941	1.44706	1.24118	1.62941	1.43529	1.55882	1.37647	1.45294	1.27647	1.78824	1.36471	1.48824	1.50588	1.41176	1.35882	1.09412	1.22941	1.62941	1.64118	1.64706	1.65294	1.40588	1.30588	1.30588	1.25882	1.22941	1.4	1.6
TCA - Ser	1.75294	1.30588	1.43529	1.24118	1.61765	1.27647	1.72353	1.72941	1.42941	1.60588	1.38824	1.16471	1.19412	1.13529	1.17647	1.1	1.86471	1.53529	1.72941	1.38235	1.43529	1.15882	1.39412	1.12941	1.67647	1.26471	1.36471	1.42941	1.67059	1.19412	1.75294	1.41765	1.6	1.62353	1.27647	1.17647	1.26471	1.02941	1.79412	1.77059	1.77059	1.77059	1.35294	1.29412	1.27059	1.17059	1.26471	1.26471	1.65882
TCC - Ser	0.552941	1.04706	0.764706	0.964706	0.688235	0.964706	0.517647	0.470588	0.882353	0.605882	0.864706	1.15882	1.15882	1.18235	1.15294	1.26471	0.488235	0.741176	0.588235	0.747059	0.923529	1.02353	0.935294	1.04118	0.670588	0.841176	0.8	0.894118	0.7	0.958824	0.347059	0.9	0.605882	0.641176	0.952941	1.04118	1.08235	1.11765	0.529412	0.535294	0.535294	0.541176	0.935294	1.01765	1.01765	1.11176	1.03529	0.982353	0.547059
TCG - Ser	0.223529	0.329412	0.452941	0.417647	0.3	0.405882	0.235294	0.229412	0.305882	0.347059	0.435294	0.376471	0.329412	0.394118	0.364706	0.382353	0.258824	0.358824	0.352941	0.482353	0.229412	0.470588	0.241176	0.641176	0.235294	0.570588	0.411765	0.241176	0.323529	0.423529	0.170588	0.247059	0.347059	0.311765	0.347059	0.464706	0.476471	0.605882	0.194118	0.194118	0.194118	0.2	0.223529	0.394118	0.388235	0.482353	0.470588	0.394118	0.176471
TCT - Ser	1.3	1.1	1.11765	1.18235	1.21176	1.11765	1.36471	1.42353	1.15882	1.20588	1.07647	1.11176	1.12941	1.10588	1.11765	1.05882	1.17059	1.13529	1.10588	1.2	1.11176	1.09412	1.16471	0.970588	1.22941	1.13529	1.23529	1.12941	1.09412	1.2	1.57059	1.13529	1.21765	1.15294	1.18235	1.07647	0.982353	0.947059	1.33529	1.34706	1.34118	1.32941	1.23529	1.12941	1.14706	1.05294	1.1	1.14706	1.43529
ACA - Thr	2.192	1.9	1.832	1.744	2.072	1.744	2.196	2.192	2.016	2.052	1.868	1.508	1.564	1.472	1.536	1.436	2.144	1.9	2.02	1.564	1.916	1.652	2.016	1.364	2.164	1.716	1.96	1.932	2.032	1.744	2.056	1.916	2.048	1.98	1.776	1.656	1.592	1.448	2.244	2.188	2.172	2.2	1.908	1.66	1.62	1.476	1.564	1.784	1.976
ACC - Thr	0.544	0.832	0.752	0.916	0.588	0.908	0.512	0.5	0.708	0.612	0.808	1.132	1.064	1.152	1.112	1.176	0.512	0.76	0.56	0.756	0.804	0.88	0.764	1.008	0.64	0.876	0.756	0.792	0.632	0.944	0.372	0.844	0.616	0.668	0.876	0.98	0.96	0.98	0.512	0.544	0.556	0.544	0.764	0.9	0.932	1.032	0.976	0.884	0.608
ACG - Thr	0.236	0.468	0.468	0.452	0.324	0.476	0.348	0.276	0.38	0.336	0.388	0.424	0.372	0.436	0.4	0.448	0.24	0.368	0.384	0.5	0.248	0.56	0.316	0.8	0.228	0.556	0.428	0.24	0.388	0.508	0.176	0.268	0.34	0.336	0.448	0.496	0.58	0.808	0.196	0.204	0.212	0.204	0.312	0.456	0.444	0.588	0.564	0.412	0.184
ACT - Thr	1.024	0.804	0.952	0.888	1.016	0.872	0.944	1.036	0.896	1	0.936	0.936	0.996	0.944	0.948	0.936	1.104	0.972	1.036	1.18	1.032	0.912	0.904	0.828	0.972	0.856	0.86	1.032	0.948	0.8	1.392	0.972	1	1.016	0.896	0.868	0.872	0.764	1.048	1.064	1.06	1.048	1.012	0.984	1.004	0.904	0.896	0.92	1.232
GTA - Val	1.264	0.8	0.904	0.884	1.02	0.86	1.268	1.268	0.844	1.088	0.864	0.632	0.612	0.628	0.648	0.576	0.948	0.912	0.964	1.012	0.8	0.708	0.844	0.584	1.14	0.976	1.128	0.824	0.948	0.772	1.48	0.812	1.096	0.92	0.92	0.752	0.6	0.564	1.248	1.232	1.232	1.244	0.844	0.732	0.72	0.664	0.716	0.84	1.124
GTC - Val	0.58	0.872	0.716	0.876	0.696	0.884	0.592	0.584	0.804	0.576	0.692	0.968	0.924	0.98	0.96	0.956	0.492	0.716	0.56	0.648	0.756	0.768	0.784	0.736	0.66	0.764	0.756	0.728	0.672	0.976	0.38	0.744	0.576	0.608	0.864	0.916	0.872	1.012	0.556	0.564	0.58	0.576	0.812	0.84	0.852	0.92	0.9	0.86	0.636
GTG - Val	0.784	1.328	1.312	1.324	0.952	1.356	0.832	0.78	1.24	1.096	1.364	1.488	1.48	1.488	1.484	1.56	1.04	1.256	1.084	1.092	1.252	1.516	1.264	1.708	0.86	1.272	1.176	1.228	1.212	1.24	0.628	1.276	1.096	1.216	1.268	1.492	1.532	1.54	0.8	0.82	0.824	0.804	1.192	1.4	1.42	1.512	1.408	1.368	0.804
GTT - Val	1.372	1.004	1.068	0.916	1.332	0.9	1.312	1.368	1.116	1.24	1.08	0.912	0.984	0.9	0.908	0.912	1.524	1.12	1.392	1.248	1.196	1.004	1.112	0.968	1.34	0.988	0.94	1.216	1.164	1.012	1.508	1.168	1.232	1.26	0.948	0.836	0.996	0.88	1.396	1.38	1.36	1.376	1.152	1.028	1.008	0.904	0.972	0.936	1.436
TAC - Tyr	0.69	1.118	0.95	1.116	0.822	1.16	0.714	0.684	0.998	0.892	1.018	1.108	1.046	1.124	1.102	1.1	0.81	0.972	0.806	0.808	0.918	0.988	1.024	1.164	0.766	0.928	0.864	0.916	0.97	1.13	0.444	0.91	0.898	0.942	1.104	1.182	1.224	1.19	0.676	0.682	0.69	0.688	0.908	1.024	1.026	1.126	1.098	1.096	0.76
TAT - Tyr	1.31	0.882	1.05	0.884	1.178	0.84	1.286	1.316	1.002	1.108	0.982	0.892	0.954	0.876	0.898	0.9	1.19	1.028	1.194	1.192	1.082	1.012	0.976	0.836	1.234	1.072	1.136	1.084	1.03	0.87	1.556	1.09	1.102	1.058	0.896	0.818	0.776	0.81	1.324	1.318	1.31	1.312	1.092	0.976	0.974	0.874	0.902	0.904	1.24
[truncated: 15 more columns]
